# Supplementary material for: Conductive Zn(ii)-metallohydrogels: the role of alkali metal cation size in gelation, rheology and conductance
Source: Royal Society of Chemistry journal article supplement (doi:10.1039/d1me00042j), 2021-01-01
Supplement: d1me00042j1.pdf [file d1me00042j1.pdf]

Electronic Supporting Information

**Conductive Zn(II)-metallohydrogels: Role of alkali metal cations size over gelation, rheology and conductance**

Chinthakuntla Mahendar,<sup>a</sup> Yeeshu Kumar,<sup>a</sup> Manish Kumar Dixit,<sup>a</sup> Moupia Mukherjee,<sup>a</sup> Abul Kalam<sup>b</sup>  
and Mrigendra Dubey<sup>\*a</sup>

<sup>a</sup>*Soft Materials Research Laboratory, Department of Metallurgy Engineering and Materials  
Science, Indian Institute of Technology Indore, Indore-453552, India*

<sup>b</sup>*Department of Chemistry, College of Science, King Khalid University, Abha 61413, Saudi  
Arabia*

\*Email: [mdubey@iiti.ac.in](mailto:mdubey@iiti.ac.in), [mrigendradubey@gmail.com](mailto:mrigendradubey@gmail.com)

---

| <b><u>Table of Contents:</u></b> | <b><u>Pages</u></b> |
|----------------------------------|---------------------|
| Synthesis and Characterization   | S2                  |
| Scheme S1                        | S2                  |
| Figure S1                        | S2                  |
| Figure S2                        | S3                  |
| Table S1                         | S3                  |
| Table S2                         | S3                  |
| Table S3                         | S4                  |
| TableS4                          | S4                  |
| Figure S4                        | S4                  |
| Figure S5                        | S4                  |
| Figure S6                        | S5                  |
| Figure S7                        | S5                  |
| Figure S8                        | S6                  |
| Figure S9                        | S7                  |
| Figure S10                       | S8                  |
| Figure S11                       | S8                  |
| Figure S12                       | S8                  |
| Figure S13                       | S9                  |
| Figure S14                       |                     |

## EXPERIMENTAL SECTION

## Synthesis and characterization:

**(10E, 15E)-N<sup>1</sup>,N<sup>4</sup>-bis(2-hydroxybenzylidene)trepthalohydrazide (o-H<sub>4</sub>TEP)**

Terephthalohydrazide was synthesized from dimethyl terephthalate and hydrazine hydrate by following literature.<sup>1</sup> Methanolic solution of 2-Hydroxybenzaldehyde (0.628 g, 5.15 mmol) was added dropwise to suspension of terephthalohydrazide (0.500 g, 2.577 mmol) in methanol. Further, the resulting suspension was refluxed for 5-6 hours at 60°C to complete the reaction. It afforded white coloured solid compound which was washed with methanol, water and Diethyl Ether and dried in vacuum. Yield 1.0 g (88%). <sup>1</sup>H NMR (DMSO-*d*<sub>6</sub>, 400 MHz, ppm) δ<sub>H</sub> 7.14 (d, 4H, Ar), 7.51 (t, 2H, Ar), 7.77 (d, 2H, Ar), 8.28 (s, 4H, Ar), 8.87 (s, 2H, =CH), 11.40 (s, 2H, OH) and 12.42 (s, 2H, -NH).

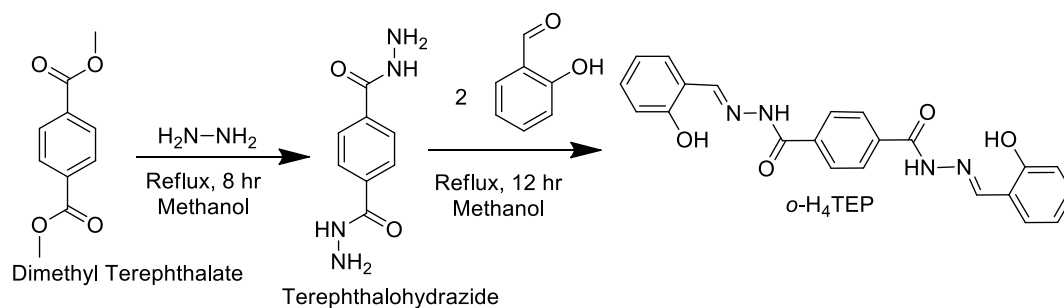

**Scheme S1:** Synthetic route adopted for the synthesis of o-H<sub>4</sub>TEP.

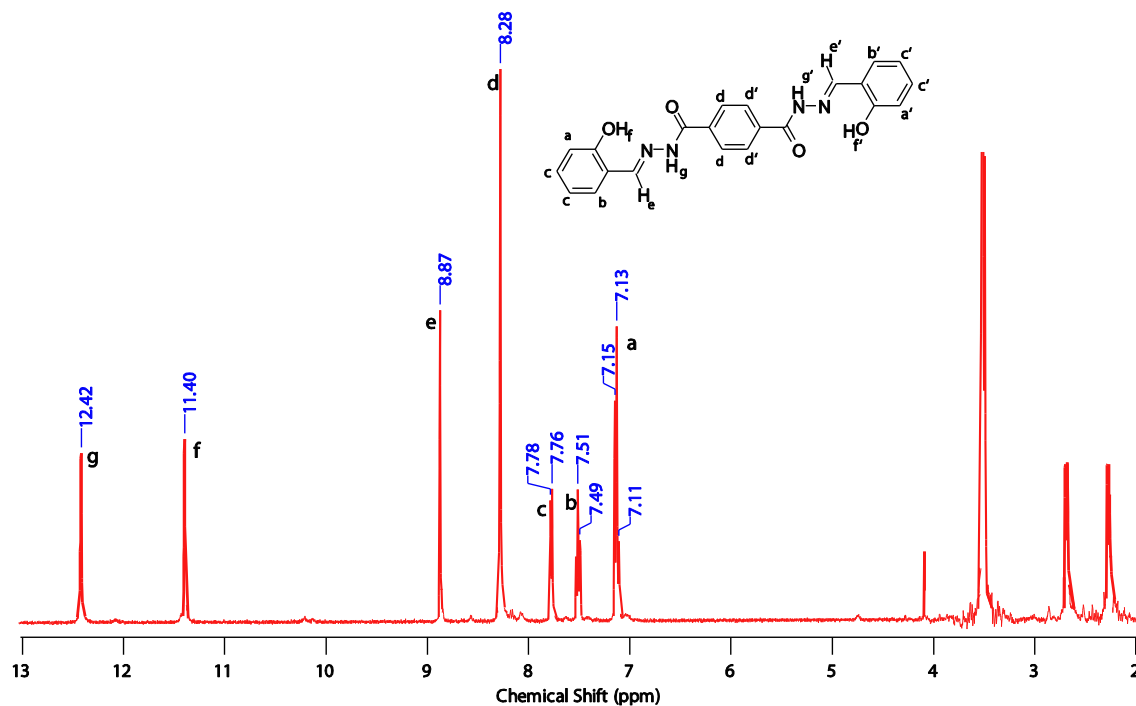

**Figure S1.** <sup>1</sup>H NMR Spectra of o-H<sub>4</sub>TEP in DMSO-*d*<sub>6</sub>, 400 MHz, ppm.

**Table S1:** Gelation tests in various common laboratory solvents\*

| S. N. | Solvent      | <i>o</i> -H <sub>4</sub> TEP/ LiOH/<br>Zn(NO <sub>3</sub> ) <sub>2</sub> |
|-------|--------------|--------------------------------------------------------------------------|
| 1.    | Water        | G                                                                        |
| 2.    | Acetonitrile | S                                                                        |
| 3.    | Methanol     | p                                                                        |
| 4.    | Ethanol      | p                                                                        |
| 5.    | DMF          | S                                                                        |
| 6.    | DMSO         | S                                                                        |
| 7.    | Acetone      | S                                                                        |
| 8.    | Chloroform   | S                                                                        |
| 9.    | DCM          | S                                                                        |
| 10.   | THF          | S                                                                        |

\*Where, S= solution, G= gel, P= precipitate.

**Table S2:** Gel or sol formation of *o*-H<sub>4</sub>TEP in presence of Zn(NO<sub>3</sub>)<sub>2</sub> with different alkali bases\*

| Solvent          | 1+LiOH | 1+NaOH | 1+KOH | 1+CsOH |
|------------------|--------|--------|-------|--------|
| H <sub>2</sub> O | G      | G      | G     | G      |

\*Where, G= gel.

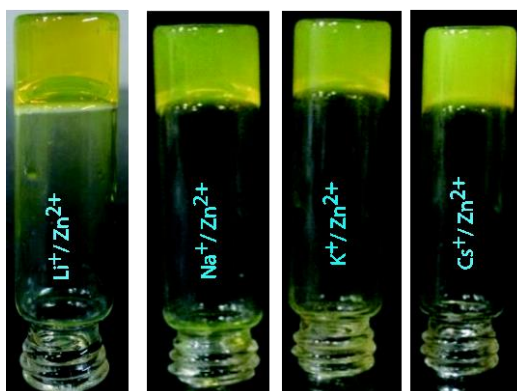

**Figure S2.** Picture represents the gelation ability of *o*-H<sub>4</sub>TEP with (A) Li<sup>+</sup>, (B) Na<sup>+</sup>, (C) K<sup>+</sup> and (D) Cs<sup>+</sup>.

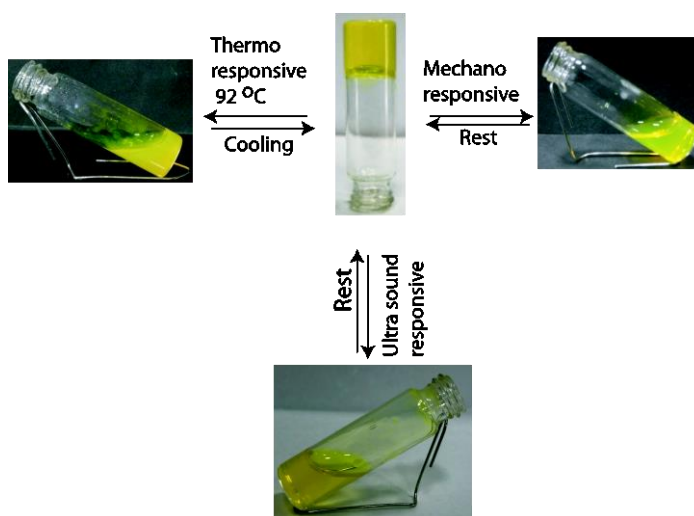

**Figure S3:** Stimuli responsive properties of MH-Li metallogel.

**Table S3:** Screening of gelation behaviour of *o*-H<sub>4</sub>TEP +LiOH in presence of different transition metal nitrates

| Solvent          | Co(NO <sub>3</sub> ) <sub>2</sub> | Cu(NO <sub>3</sub> ) <sub>2</sub> | Fe(NO <sub>3</sub> ) <sub>2</sub> | Cd(NO <sub>3</sub> ) <sub>2</sub> | Zn(NO <sub>3</sub> ) <sub>2</sub> |
|------------------|-----------------------------------|-----------------------------------|-----------------------------------|-----------------------------------|-----------------------------------|
| H <sub>2</sub> O | P                                 | P                                 | P                                 | P                                 | G                                 |

\*Where, G= gel and P= precipitate.

**Table S4:** Effect of Counter anions on gel formation in presence of *o*-H<sub>4</sub>TEP/LiOH

| Solvent          | Zn(OAc) <sub>2</sub> | ZnCl <sub>2</sub> | Zn(ClO <sub>4</sub> ) <sub>2</sub> | ZnSO <sub>4</sub> | Zn(NO <sub>3</sub> ) <sub>2</sub> |
|------------------|----------------------|-------------------|------------------------------------|-------------------|-----------------------------------|
| H <sub>2</sub> O | P                    | P                 | P                                  | P                 | G                                 |

\*Where, G= gel and P= precipitate.

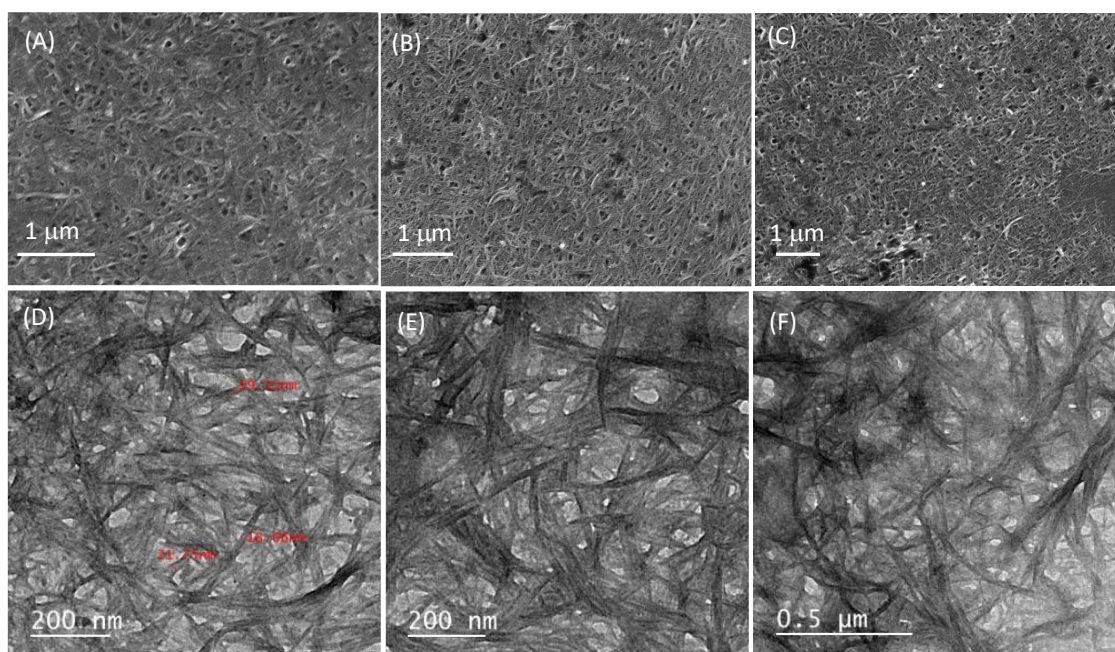

**Figure S4. MH-Li :** (A-C) FE-SEM and (D-F) TEM at different magnifications.

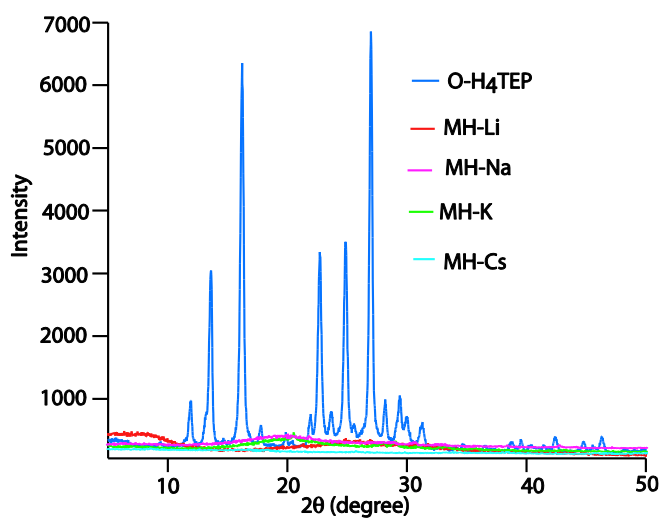

**Figure S5.** PXRD pattern of *o*-H<sub>4</sub>TEP (Blue line), MH-Li (Red line), MH-Na (Pink line), MH-K (Green line) and MH-Cs (Sky Blue line) xerogels.

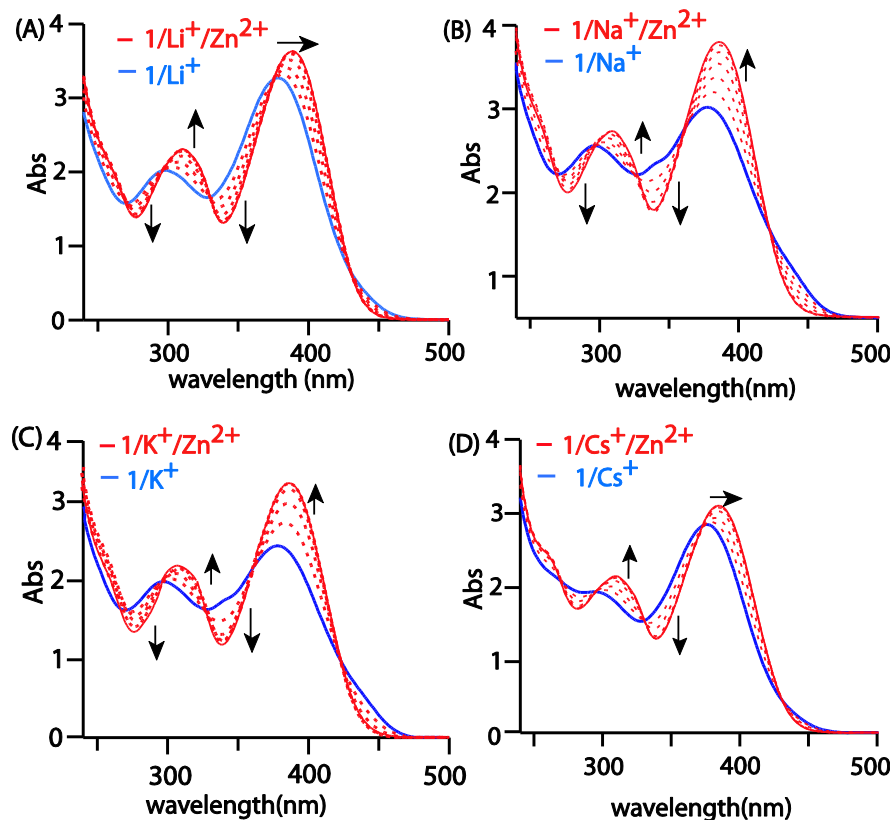

Figure S6. UV-vis titration experiments of (A) LiOH, (B) NaOH, (C) KOH and (D) CsOH deprotonated *o*-H<sub>4</sub>TEP (1) (1X10<sup>-4</sup>M, H<sub>2</sub>O) with 2 equivalents of Zn(NO<sub>3</sub>)<sub>2</sub> (1X10<sup>-2</sup>M, H<sub>2</sub>O).

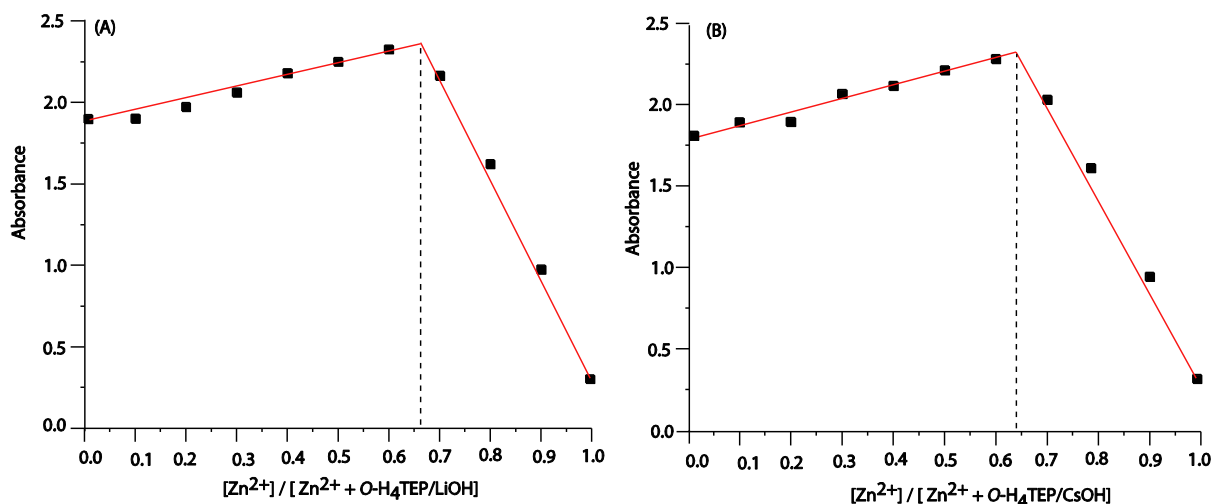

Figure S7. Job's plot for (A) LiOH deprotonated *o*-H<sub>4</sub>TEP vs Zn(NO<sub>3</sub>)<sub>2</sub> (B) CsOH deprotonated *o*-H<sub>4</sub>TEP vs Zn(NO<sub>3</sub>)<sub>2</sub>.

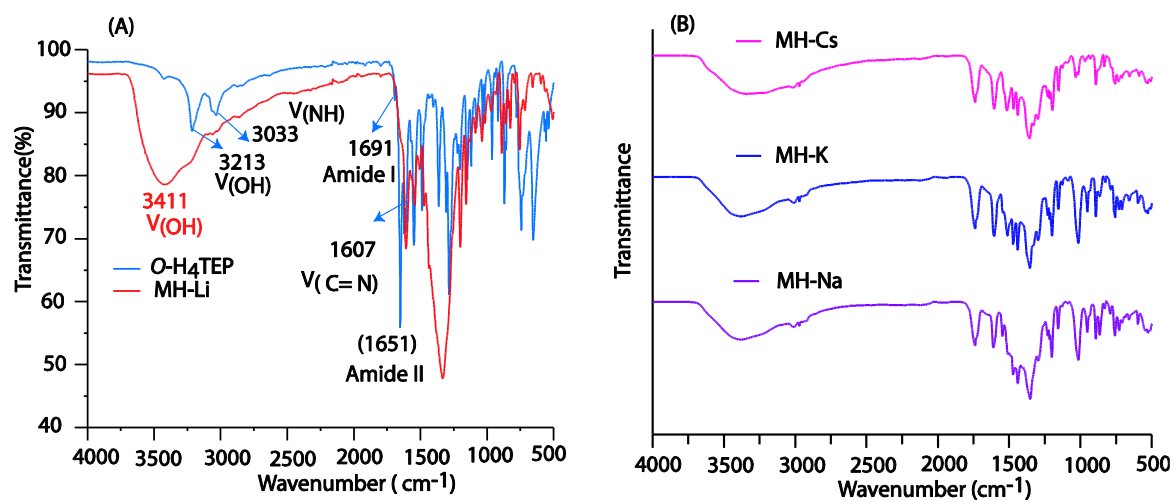

Figure S8. FT-IR spectra of (A) *o*-H<sub>4</sub>TEP and MH-Li xerogel (B) MH-Na, MH-K, MH-Cs xerogels.

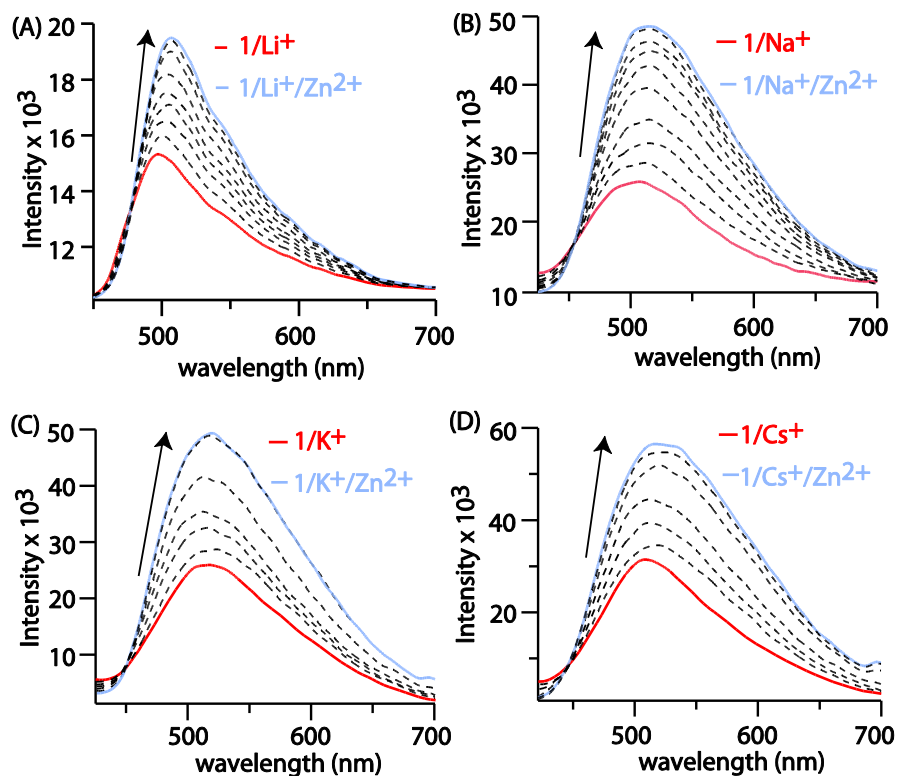

Figure S9: Fluorescence titration of alkali base (A). Li<sup>+</sup>, (B). Na<sup>+</sup>, (C). K<sup>+</sup>, (D). Cs<sup>+</sup> deprotonated *o*-H<sub>4</sub>TEP (10<sup>-4</sup> M) with Zn(NO<sub>3</sub>)<sub>2</sub> (10<sup>-2</sup>M).

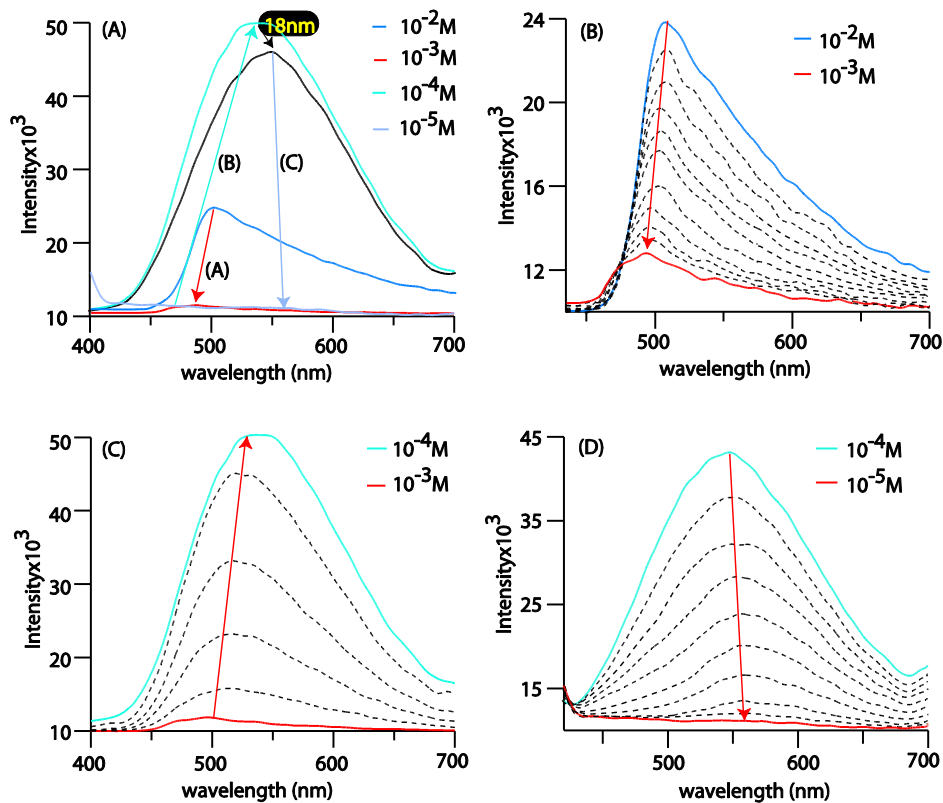

**Figure S10: Fluorescence dilution experiment of MH-Li Gel:** (A) complete comparative dilution analysis, 18 nm red shift was observed upon dilution from  $1 \times 10^{-4} \text{ M}$  to  $0.85 \times 10^{-4} \text{ M}$ , represented in black line (B) Dilution from  $10^{-2} \text{ M}$  to  $10^{-3} \text{ M}$  shows presence of CHEFF phenomenon, (C) Dilution from  $10^{-3} \text{ M}$  to  $10^{-4} \text{ M}$  shows presence of ACQ phenomenon and (D) Dilution from  $10^{-4} \text{ M}$  to  $10^{-5} \text{ M}$  shows dilution effect.

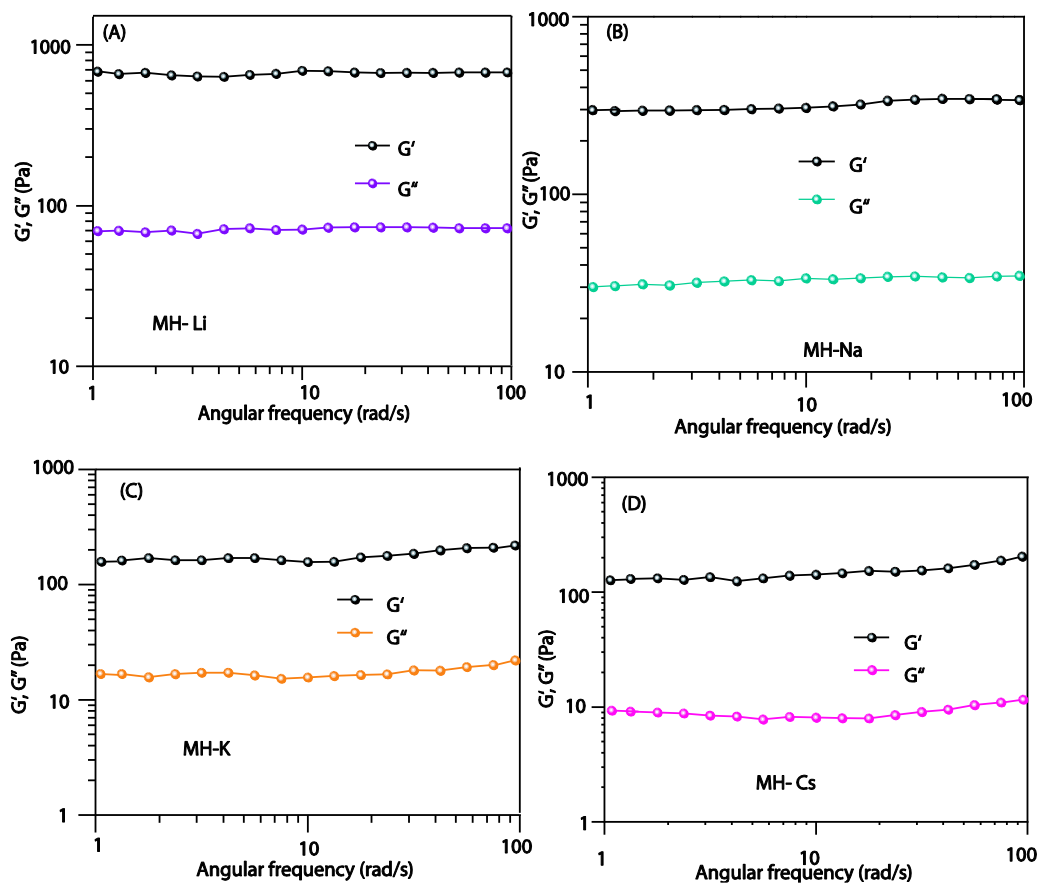

**Figure S11. Dynamic Frequency Sweep:** (A) MH-Li (B) MH-Na (C) MH-K and (D) MH-Cs.

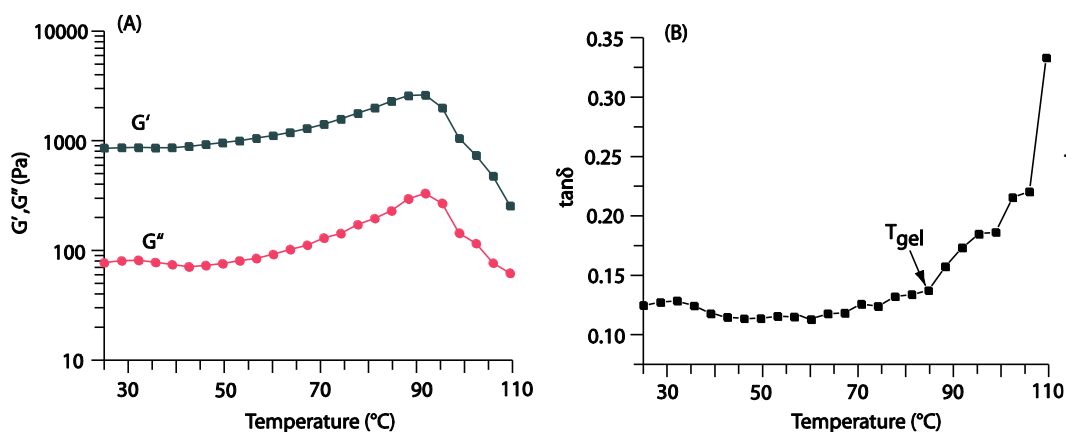

**Figure S12.** (A) Dynamic temperature ramp over the loss modulus ( $G''$ ) and storage modulus ( $G'$ ) for MH-Li, (B) Plot of  $\tan \delta$  vs. temperature and  $T_{gel} = 85^\circ\text{C}$ .

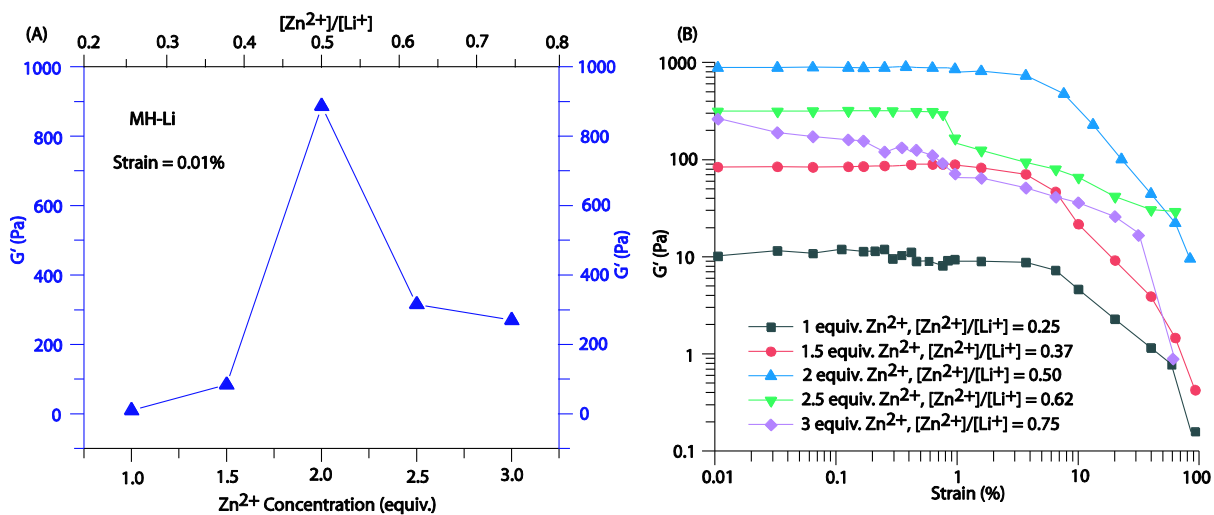

**Figure S13.** Effect of  $[\text{Zn}^{2+}]$  concentration on the rheological properties of MH-Li; (A) plot the  $G'$  values against the concentration of  $\text{Zn}^{2+}$  along with the ratio of  $[\text{Zn}^{2+}]/[\text{Li}^+]$  at 0.01 % strain and (B) Plot of  $G'$  vs strain at various  $\text{Zn}^{2+}$  concentrations.



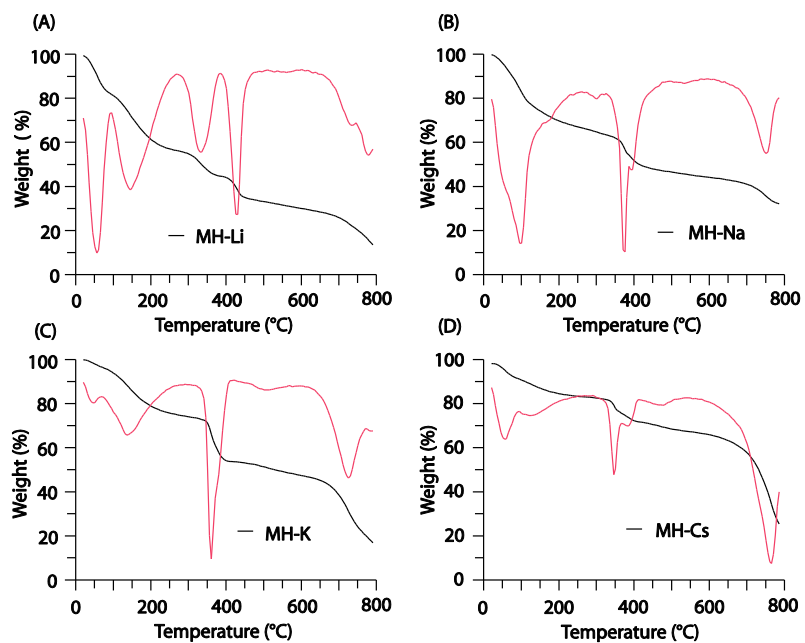

**Figure S14.** The Thermo Gravimetric Analysis (TGA) along with derivative plot for (A) MH-Li (B) MH-Na (C) MH-K and (D) MH-Cs xerogels.

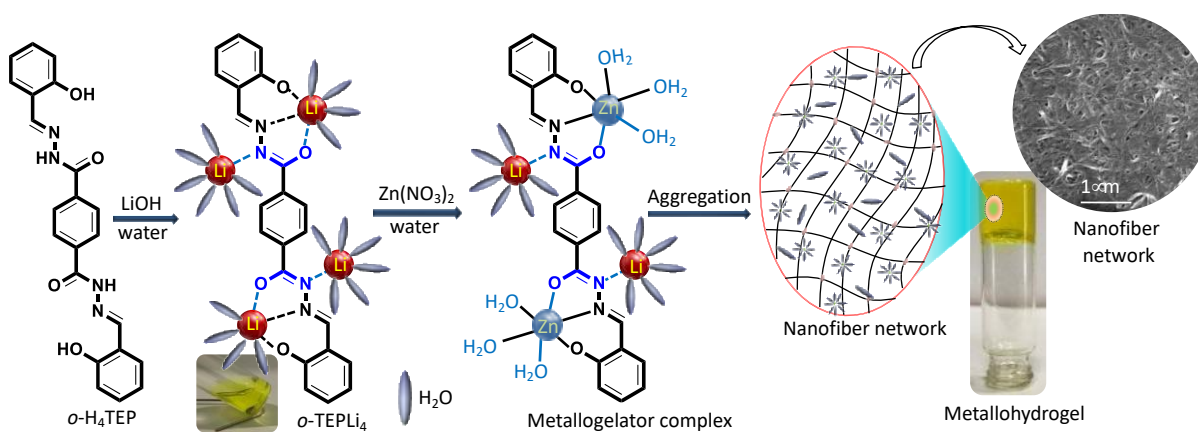

**Figure S15.** Pictorial representation of steps involved in gelation process.

#### References:

1. M. Dubey, A. Kumar, R. K. Gupta and D. S. Pandey, *Chem. Commun.*, 2014, **50**, 8144.
